# Supplementary material for: An Oomycete CRN Effector Reprograms Expression of Plant HSP Genes by Targeting their Promoters
Source: PubMed Central journal article supplement (PMC4695088; doi:10.1371/journal.ppat.1005348), 2015-12-29
Supplement: ppat.1005348.s002.pdf [file ppat.1005348.s002.pdf]

|           | SP               | LFLAK                                             |                      |
|-----------|------------------|---------------------------------------------------|----------------------|
| PsCRN108  | MVKLYCAVVGAGSAFS | RVDES <del>DTVDDLKDAIKAKKPNDFK</del> IDADKLELYVAK | RDG <del>VW</del> 60 |
| PsCRN112a | MVKLYCAVVGAGSAFS | RVDES <del>DTVDDLKDAIKAKKPNDFK</del> IDADKLELYVAK | RDG <del>VW</del> 60 |
| PsCRN112b | MVKLYCAVVGAGSAFS | RVDES <del>DTVDDLKDAIKAKKPNDFK</del> IDADKLELYVAK | RDG <del>VW</del> 60 |
| PsCRN112c | MVKLYCAVVGAGSAFS | RVDES <del>DTVDDLKksIKAKKPN</del> IKDIDADKLELYVAK | RDG <del>eW</del> 60 |

|           | DWL                                                         |        |
|-----------|-------------------------------------------------------------|--------|
| PsCRN108  | LTEADVKSGVADITGLVRLEVVRAKLFSVGLSDEVVSEVDAQEEAAAGRGPVNVLVVVP | AK 120 |
| PsCRN112a | LTEADVKSGVADITGLVRLEVVRAKLFSVGLSDEVVSEVDAQEEAAAGRGPVNVLVVVP | AK 120 |
| PsCRN112b | LTEADVKSGVADITGLVRLEVVRAKLFSVGLSDEVVSEVDAQEEAAAGRGPVNVLVVVP | AK 120 |
| PsCRN112c | LTEADVKSGVADITGLVRLEVVRAKLFSVGLSDEVVSEVDAQEEAAAGRGPVNVLVVVP | AK 120 |

|           | NLS                                                         |     |
|-----------|-------------------------------------------------------------|-----|
| PsCRN108  | KRRVDAGVDEERRFFDTRDFPPLAPPQRGATVESPEAQWEKLLNSLEWKEPKRLCASSG | 180 |
| PsCRN112a | KRRVDAGVDEERRFFDTRDFPPLAPPQRGATVESPEAQWEKLLNSLEWKEPKRLCASSG | 180 |
| PsCRN112b | KRRVDAGVDEERRFFDTRDFPPLAPPQRGATVESPEAQWEKLLNSLEWKEPKRLCASSG | 180 |
| PsCRN112c | KRRVDAGVDEERRFFDTRDFPPLAPPQRGATVESPEAQWEKLLNSLEWkPrLCASSG   | 180 |

|           |                                                             |     |
|-----------|-------------------------------------------------------------|-----|
| PsCRN108  | QNWPYQGESELAGHLVEPLALHYTAWYLNEDKQNHAINLVLSGPGTGKSRMLDQMKGLM | 240 |
| PsCRN112a | QNWPYQGESELAGHLVEPLALHYTAWYLNEDKQNHAINLVLSGPGTGKSRMLDQMKGLM | 240 |
| PsCRN112b | QNWPYQGESELAGHLVEPLALHYTAWYLNEDKQNHAINLVLSGPGTGKSRMLDQMKGLM | 240 |
| PsCRN112c | QdWPYQGESELAGHLVEPLALHYTAWYLNEDKQNHAINLVLSGPGTGKSRMLDQMKGLM | 240 |

|           |                                                             |     |
|-----------|-------------------------------------------------------------|-----|
| PsCRN108  | CAAAARSNNRKLKERMENAFVFSVTFENGTSATGSLDRDNPEDFISYRMLYQLSKDRpn | 300 |
| PsCRN112a | CAAAARSNNRKLKERMENAFVFSVTFENGTSATGSLDRDNPEDFISYRMLYQLSKDRKA | 300 |
| PsCRN112b | CAAAARSNNRKLKERMENAFVFSVTFENGTSATGSLDRDNPEDFISYRMLYQLSKDRKA | 300 |
| PsCRN112c | CAAAAISNNRKLKERMENAFVFSVTFENGTSATGSLDRDNPEDFISYRMLYQLSKDRKA | 300 |

CTCTCGAAAGCAAAAAAGCG

|           | GCCAAGACGTGAAGTCATAT     | TTCACATCGTCAATCCCTTT                 |     |
|-----------|--------------------------|--------------------------------------|-----|
| PsCRN108  | WkFaktLk-syrSLeIdTeaaIg  | ILAKLKGIDDVKKMTVILCVDGLQKLVNDGTKSCDF | 359 |
| PsCRN112a | WPVFVDKLRMCSSPLRIRIQIVID | ILAKLKGIDDVKKMTVILCVDGLQKLVNDGTKSCDF | 360 |
| PsCRN112b | WPVFVDKLRMCSSPLRIRIQIVID | ILAKLKGIDDVKKMTVILCVDGLQKLVNDGTKSCDF | 360 |
| PsCRN112c | WPVFVDKLRMCSSPLRIRIQIVID | ILAKLKGIDDVKKMTVILCVDGLQKLVNDGTKSCDF | 360 |

|           | TCACGATCTGAATACGCAA                                          |     |
|-----------|--------------------------------------------------------------|-----|
| PsCRN108  | YRVLASVCSFLNSSRAFAVCVCSATIQSPVDKALS DSPQKRFLVPPPLRGHEVLPTKTR | 419 |
| PsCRN112a | YRVLASVCSFLNSSRAFAVCVCSATIQSPVDKALS DSPQKRFLVPPPLRGHEVLPTKTR | 420 |
| PsCRN112b | YRVLASVCSFLNSSRAFAVCVCSATIQSPVDKALS DSPQKRFLVPPPLRGHEVLPTKTR | 420 |
| PsCRN112c | YRVLASVCSFLNSSRAFAVCVCSATIQSPVDIALSDSPQKRFLVPPPLRGHEVLPTKTR  | 420 |

|           |                                                               |     |
|-----------|---------------------------------------------------------------|-----|
| PsCRN108  | IEKQLVDDMGHGGRaletlQLFLSHYTKDQLEEMDPTWMFEKICDALRLQYGDIFASFFF  | 479 |
| PsCRN112a | IEKQLVDDMGHGGRaletlQLFLSHYTKDQLEEMDPTWMFEKVC DALRLQYGDIFASFFF | 480 |
| PsCRN112b | IEKQLVDDMGHGGRaletlQLFLSHYTKDQLEEMDPTWMFEKVC DALRLQYGDIFASFFF | 480 |
| PsCRN112c | IEKQLVDDMGHGGRaletlQLFLSHYTKDQLEEMDPTWMFEKVC DALRLQYGDIFASFFF | 480 |

|           |                                                              |     |
|-----------|--------------------------------------------------------------|-----|
| PsCRN108  | QDPYNCREVLAAIILSRRRYKLFDRIGRTDMTVCLRSFGLFRWGAEGHLECAFILLVLLM | 539 |
| PsCRN112a | QDPYNCREVLAAIILSRRRYKLFDRIGRTDMTVCLRSFGLFRWGAEGHLECAFILLVLLM | 540 |
| PsCRN112b | QDPYNCREVLAAIILSRRRYKLFDRIGRTDMTVCLRSFGLFRWGAEGHLECAFILLVLLM | 540 |
| PsCRN112c | QDPYNCREVLAAIILSRRRYKLFDRIGRTDMTVCLRSFGLFRWGAEGHLECAFILLVLLM | 540 |

PsCRN108 QKLPKKLGEVDNFDDHLTRTVLVWQRFQFVAFYRRVKSIAYCETPVALS<sup>S</sup>FHAGARFGA 599  
 PsCRN112a QKLPKKLGEVDNFDDHLTRTVLVWQRFQFVAFYRRVKSIAYCETPVALS<sup>S</sup>FHAGARFGA 600  
 PsCRN112b QKLPKKLGEVDNFDDHLTRTVLVWQRFQFVAFYRRVKSIAYCETPVALS<sup>S</sup>FHAGARFGA 600  
 PsCRN112c QKLPKKLGEVDNFDDHLTRTVLVWQRFQFVAFYRRVKSIAYCETPVALS<sup>g</sup>FHAGARFGA 600

PsCRN108 IQDIIITEPTSRTVVEALRQEDTKSSSDSTCFTNRDGGVKISDMDTIVINGASASAGDL 659  
 PsCRN112a IQDIIITEPTSRTVVEALRQEDTKSSSDSTCFTNRDGGVKISDMDTIVINGASASAGDL 660  
 PsCRN112b IQDIIITEPTSRTVVEALRQEDTKSSSDSTCFTNRDGGVKISDMDTIVINGASASAGDL 660  
 PsCRN112c IQDIIITEPTSRTVVEALRQEDTKSSSDSTCFTNRDGGVKISDMDTIVINGASASAGDL 660

PsCRN108 FMRVQLKVGQRNVQCNEVIQCKLLQTKQKIHEDAYAKERAKAANESSDVFLLVTPAQATE 719  
 PsCRN112a FMRVQLKVGQRNVQCNEVIQCKLLQTKQKIHEDAYAKERAKAANESSDVFLLVTPAQATE 720  
 PsCRN112b FMRVQLKVGQRNVQCNEVIQCKLLQTKQKIHEDAYAKERAKAANESSDVFLLVTPAQATE 720  
 PsCRN112c FMRVQLKVGQRNVQCNEVIQCKLLQTKQKIHEDAYAKERAKAANESSDVFLLVTPAQATE 720

HhH

PsCRN108 FDLPPRCGLVSNANFGRYFGPFTSRAYRSFLEPPNINTASFH<sup>L</sup>RRLEGVGDATAAKIIA 779  
 PsCRN112a FDLPPRCGLVSNANFGRYFGPFTSRAYRSFLEPPNINTASFH<sup>L</sup>RRLEGVGDATAAKIIA 780  
 PsCRN112b FDLPPRCGLVSNANFGRYFGPFTSRAYRSFLEPPNINTASFH<sup>L</sup>RRLEGVGDATAAKIIA 780  
 PsCRN112c FDLPPRCGLVSNANFGRYFGPFTSRAYRSFLEPPNINTASFH<sup>L</sup>RRLEGVGDATAAKIIA 780

PsCRN108 ERTIRRF<sup>S</sup>NLEDALNRLVPSKKGKTAMILSRMHYDDEADL\* 821  
 PsCRN112a ERTIRRF<sup>S</sup>NLEDALNRLVPSKKGKTAMILSRMHYDDEADL\* 822  
 PsCRN112b ERTIRRF<sup>S</sup>NLEDALNRLVPSKKGKTAMILSRMHYDDEADL\* 822  
 PsCRN112c ERTIRRF<sup>S</sup>NLEDALNRLVPSKKGKTAMILSRMHYDDEADL\* 822
