# Supplementary material for: An Oomycete CRN Effector Reprograms Expression of Plant HSP Genes by Targeting their Promoters
Source: PubMed Central journal article supplement (PMC4695088; doi:10.1371/journal.ppat.1005348), 2015-12-29

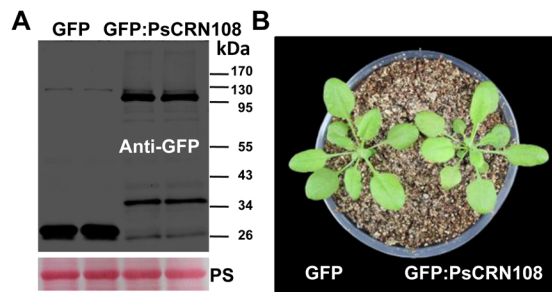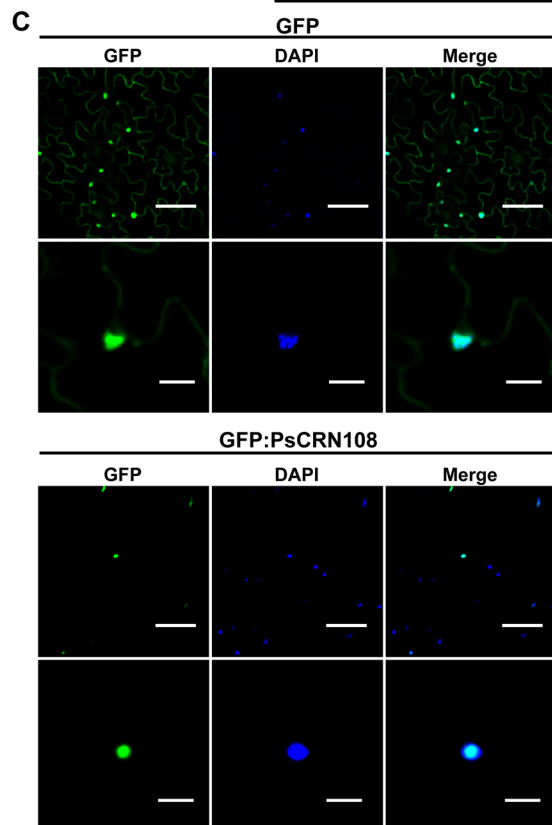

Supplement: ppat.1005348.s004.pdf [file ppat.1005348.s004.pdf]
